# Supplementary material
Source: publisher figshare collection journal article supplement (https://gsapubs.figshare.com/ndownloader/files/34382561)
Supplement: Supplementary file 1 [file 34382561]

## Sheet: Sheet1
TABLE S4. LA-MC-ICP-MS LEAD ISOTOPES OF STAGE II PYRITE FROM THE SHANGGONG GOLD DEPOSIT
Segment	No.	208Pb/204Pb	2σ	207Pb/204Pb	2σ	206Pb/204Pb	2σ	207Pb/206Pb
Shanggong	SG-18-1	37.722	0.044	15.46	0.015	17.15	0.016	0.901458
	SG-18-2	37.746	0.039	15.461	0.015	17.15	0.016	0.901516
	SG-18-3	37.744	0.038	15.462	0.015	17.148	0.016	0.901679
	SG-18-4	37.557	0.051	15.481	0.021	17.127	0.021	0.903894
	SG-18-5	37.62	0.053	15.48	0.022	17.135	0.021	0.903414
	SG-18-6	37.53	0.057	15.485	0.024	17.118	0.024	0.904603
	SG-18-7	37.515	0.051	15.477	0.022	17.098	0.021	0.905194
	SG-18-8	37.568	0.06	15.472	0.026	17.128	0.026	0.903316
	SG-18-9	37.644	0.044	15.47	0.016	17.144	0.016	0.902357
	SG-18-10	37.762	0.038	15.468	0.016	17.152	0.016	0.901819
	SG-18-11	37.534	0.039	15.48	0.017	17.12	0.017	0.904206
	SG-18-12	37.715	0.044	15.486	0.017	17.171	0.018	0.901869
	SG-18-13	37.533	0.043	15.462	0.015	17.115	0.018	0.903418
	SG-18-14	37.624	0.048	15.475	0.017	17.143	0.019	0.902701
	SG-18-15	37.68	0.047	15.476	0.016	17.172	0.019	0.901235
	SG-18-16	37.811	0.05	15.468	0.021	17.164	0.021	0.901189
	SG-18-17	37.791	0.05	15.467	0.021	17.161	0.02	0.901288
	SG-18-18	37.848	0.051	15.478	0.021	17.187	0.021	0.900564
	SG-18-19	37.827	0.051	15.473	0.021	17.168	0.021	0.90127
	SG-18-20	37.815	0.063	15.492	0.024	17.23	0.026	0.899129
	SG-18-21	37.746	0.047	15.497	0.017	17.202	0.02	0.900884
	SG-18-22	38.11	0.099	15.521	0.034	17.326	0.045	0.895821
	SG-18-23	37.83	0.039	15.474	0.017	17.179	0.017	0.900751
	SG-18-24	37.828	0.039	15.474	0.016	17.172	0.016	0.901118
	SG-18-25	38.007	0.065	15.487	0.025	17.317	0.029	0.894323
	SG-18-26	38.2	0.08	15.482	0.03	17.363	0.034	0.891666
Liuxiugou	SG-1-1	39.12	0.018	15.521	0.005	17.656	0.006	0.879078
	SG-1-2	38.948	0.049	15.52	0.004	17.589	0.011	0.88237
	SG-1-3	38.514	0.058	15.464	0.013	17.299	0.033	0.893925
	SG-0-1	38.909	0.035	15.523	0.014	17.687	0.016	0.87765
	SG-0-2	39.287	0.009	15.592	0.004	18.147	0.004	0.859205
	SG-0-3	38.919	0.015	15.539	0.005	17.768	0.01	0.87455
	SG-0-4	39.272	0.013	15.596	0.002	18.139	0.006	0.859805
	SG-0-5	39.078	0.013	15.532	0.005	17.708	0.006	0.877118
	SG-0-6	39.08	0.018	15.539	0.006	17.696	0.008	0.878108
	SG-0-7	39.062	0.024	15.55	0.003	17.825	0.019	0.87237
	SG-0-8	39.153	0.015	15.558	0.003	17.911	0.009	0.868628
	SG-0-9	39.086	0.021	15.55	0.003	17.836	0.019	0.871832
	SG-0-10	39.041	0.008	15.55	0.002	17.823	0.006	0.872468
	SG-0-11	38.854	0.015	15.541	0.003	17.791	0.011	0.873532
	SG-0-12	39.106	0.036	15.551	0.004	17.852	0.022	0.871107
Hugou	18SG-98-1	37.572	0.045	15.446	0.018	17.127	0.02	0.901851
	18SG-99-1	38.298	0.019	15.48	0.003	17.252	0.004	0.897287
	18SG-99-2	38.145	0.029	15.456	0.008	17.233	0.008	0.896884
	18SG-99-3	38.199	0.051	15.437	0.019	17.229	0.019	0.895989
	18SG-99-4	38.349	0.038	15.468	0.012	17.272	0.01	0.895553
	18SG-99-5	38.228	0.029	15.475	0.008	17.247	0.007	0.897257
	18SG-99-6	38.359	0.023	15.494	0.006	17.324	0.006	0.894366
	18SG-99-7	38.394	0.054	15.484	0.016	17.279	0.018	0.896117
	18SG-99-8	38.144	0.013	15.463	0.004	17.232	0.003	0.897342
	18SG-99-9	38.227	0.045	15.473	0.016	17.38	0.023	0.890276
	18SG-99-10	38.395	0.123	15.493	0.035	17.267	0.033	0.897261
	18SG-99-11	38.444	0.089	15.509	0.027	17.308	0.021	0.89606
	18SG-99-12	38.312	0.056	15.49	0.02	17.312	0.02	0.894755
	18SG-99-13	38.203	0.036	15.463	0.012	17.298	0.013	0.893918
	18SG-99-14	38.074	0.043	15.465	0.014	17.242	0.014	0.896938
Qiliping	SG-47-1	37.519	0.01	15.437	0.004	17.075	0.004	0.90407
	SG-47-2	37.515	0.023	15.437	0.009	17.076	0.008	0.904017
	SG-52-1	37.586	0.044	15.447	0.017	17.162	0.016	0.90007
	SG-52-2	37.497	0.035	15.437	0.009	17.128	0.008	0.901273
	SG-52-3	37.559	0.034	15.454	0.009	17.124	0.011	0.902476
	SG-52-4	37.582	0.018	15.455	0.005	17.16	0.009	0.900641
	SG-52-5	37.486	0.037	15.431	0.013	17.117	0.014	0.901501
	SG-52-6	37.544	0.034	15.45	0.005	17.127	0.004	0.902084
	SG-52-7	37.546	0.016	15.45	0.005	17.087	0.005	0.904196
	SG-52-8	37.57	0.031	15.457	0.012	17.099	0.012	0.903971
	SG-52-9	37.549	0.016	15.449	0.007	17.089	0.006	0.904032
	SG-52-10	37.458	0.026	15.423	0.009	17.081	0.008	0.902933

## Sheet: Sheet2
0.901458
0.901516
0.901679
0.903894
0.903414
0.904603
0.905194
0.903316
0.902357
0.901819
0.904206
0.901869
0.903418
0.902701
0.901235
0.901189
0.901288
0.900564
0.90127
0.899129
0.900884
0.895821
0.900751
0.901118
0.894323
0.891666
0.879078
0.88237
0.893925
0.87765
0.859205
0.87455
0.859805
0.877118
0.878108
0.87237
0.868628
0.871832
0.872468
0.873532
0.871107
0.901851
0.897287
0.896884
0.895989
0.895553
0.897257
0.894366
0.896117
0.897342
0.890276
0.897261
0.89606
0.894755
0.893918
0.896938
0.90407
0.904017
0.90007
0.901273
0.902476
0.900641
0.901501
0.902084
0.904196
0.903971
0.904032
0.902933
